# Supplementary material for: Incidence and familial risk of premature ovarian insufficiency in the Finnish female population
Source: PubMed Central journal article supplement — Hum Reprod. 2022 Feb 4;37(5):1030–6. doi: 10.1093/humrep/deac014 (PMC9071220; doi:10.1093/humrep/deac014), 2022-02-04
Supplement: deac014_supplementary_table_s1.pdf [file deac014_supplementary_table_s1.pdf]

**Supplementary Table S1** Operative codes used to find information of the adnexal surgery to exclude surgical premature ovarian insufficiency (POI).

| Procedure                                                                   | Nomesco classification | Finnish Medical Association operative code | Taken into account if found       |
|-----------------------------------------------------------------------------|------------------------|--------------------------------------------|-----------------------------------|
| Bilateral oophorectomy                                                      | LAE20, LAE21           |                                            | Before the index date             |
| Unilateral oophorectomy                                                     | LAE10, LAE11           | 8202                                       | Found twice before the index date |
| Bilateral salpingo-oophorectomy                                             | LAF10, LAF11           | 8204                                       | Before the index date             |
| Excision of uterus, adnexes and lymph nodes for treatment of ovarian cancer | LAF16, LAF17           | 8308                                       | Before the index date             |
| Bilateral transvaginal salpingo-oophorectomy                                | LAF30                  |                                            | Before the index date             |
